# Supplementary material for: Plant Growth-Promoting Bacterial Consortia as a Strategy to Alleviate Drought Stress in Spinacia oleracea
Source: MDPI journal article supplement (doi:10.3390/microorganisms10091798), 2022-09-06

**Table S1.** Bacterial growth properties.

| <b>Strain</b>              | <b>Colony colour</b> | <b>Colony morphology</b> | <b>*Anaerobic growth</b> | <b>pH range</b> | <b>Temperature range (°C)</b> | <b>PEG6000 (%) range</b> |
|----------------------------|----------------------|--------------------------|--------------------------|-----------------|-------------------------------|--------------------------|
| <b>RHF6 <sup>1</sup></b>   | Creamy white         | Flat                     | +++                      | 4-10            | 15-50                         | 0-15                     |
| <b>RHFS10 <sup>2</sup></b> | White                | Undulate                 | ++                       | 6-12            | 15-50                         | 0-15                     |
| <b>LS132</b>               | Milky white          | Translucent              | ++                       | 2-10            | 25-40                         | 0-15                     |
| <b>AGS172</b>              | Creamy white         | Wrinkled                 | ++                       | 2-10            | 25-50                         | 0-20                     |
| <b>LMG9814</b>             | Creamy white         | Flat                     | ++                       | 4-10            | 25-60                         | 0-15                     |
| <b>AGS84</b>               | Creamy white         | Flat                     | ++                       | 2-12            | 25-60                         | 0-20                     |
| <b>AGS108</b>              | Creamy white         | Flat                     | ++                       | 2-12            | 25-60                         | 0-20                     |
| <b>AGS54</b>               | Creamy white         | Irregular                | +                        | 4-10            | 4-40                          | 0-15                     |

\*Anaerobic growth: +:low growth; ++:moderately growth; +++:high growth

**Table S2.** Summary of plant growth-promoting and biocontrol traits exhibited by the 8 bacterial strains.

|                     | PGP traits |     |                          |                           |                  |                | HYDROLYTIC ACTIVITIES (%) |         |          |      |
|---------------------|------------|-----|--------------------------|---------------------------|------------------|----------------|---------------------------|---------|----------|------|
| Strain              | Swarming   | PVK | IAA ( $\mu\text{g/mL}$ ) | Ammonia production (mg/L) | Siderophores (%) | Biosurfactants | Protease                  | Amylase | Xylanase | CMC  |
| RHF6 <sup>1</sup>   | +          | ++  | $4.5 \pm 0.009$          | $6.9 \pm 0.03$            | 7.1              | +              | 100                       | 100     | 41.7     | 100  |
| RHFS10 <sup>2</sup> | +++        | ++  | $6.5 \pm 0.01$           | $9.8 \pm 0.02$            | 41.7             | +              | 100                       | 100     | 76.9     | 100  |
| LS132               | +          | -   | $1.4 \pm 0.02$           | $12.1 \pm 0.1$            | 16.7             | -              | 100                       | 0       | 0        | 0    |
| AGS172              | +++        | +   | $12.9 \pm 0.08$          | $5.2 \pm 0.001$           | 11.8             | +              | 100                       | 100     | 25       | 100  |
| LMG9814             | -          | +   | $8.6 \pm 0.013$          | $2.2 \pm 0.02$            | 4.5              | -              | 100                       | 75      | 41.2     | 37.9 |
| AGS84               | +          | +   | $17.2 \pm 0.21$          | $4.1 \pm 0.015$           | 7.1              | -              | 100                       | 20      | 100      | 100  |
| AGS108              | ++         | ++  | $5.7 \pm 0.03$           | $2.5 \pm 0.1$             | 3.1              | +              | 100                       | 64.3    | 22.2     | 33.3 |
| AGS54               | -          | ++  | $24.1 \pm 0.3$           | $2.7 \pm 0.002$           | 47.1             | +              | 100                       | 4       | 0        | 47.8 |

No activity (-), halo or colony diameter < 5 mm (+), halo or colony diameter 10 mm (+++). Data are represented by means of at least three replicates  $\pm$  SE at  $p \leq 0.05$  using LDS. PVK, Pikovskaya; IAA, indoleacetic acid; and CMC, carboxymethylcellulose. <sup>1</sup> Available from Petrillo et al. (2021). <sup>2</sup> Available from Castaldi et al. (2021).

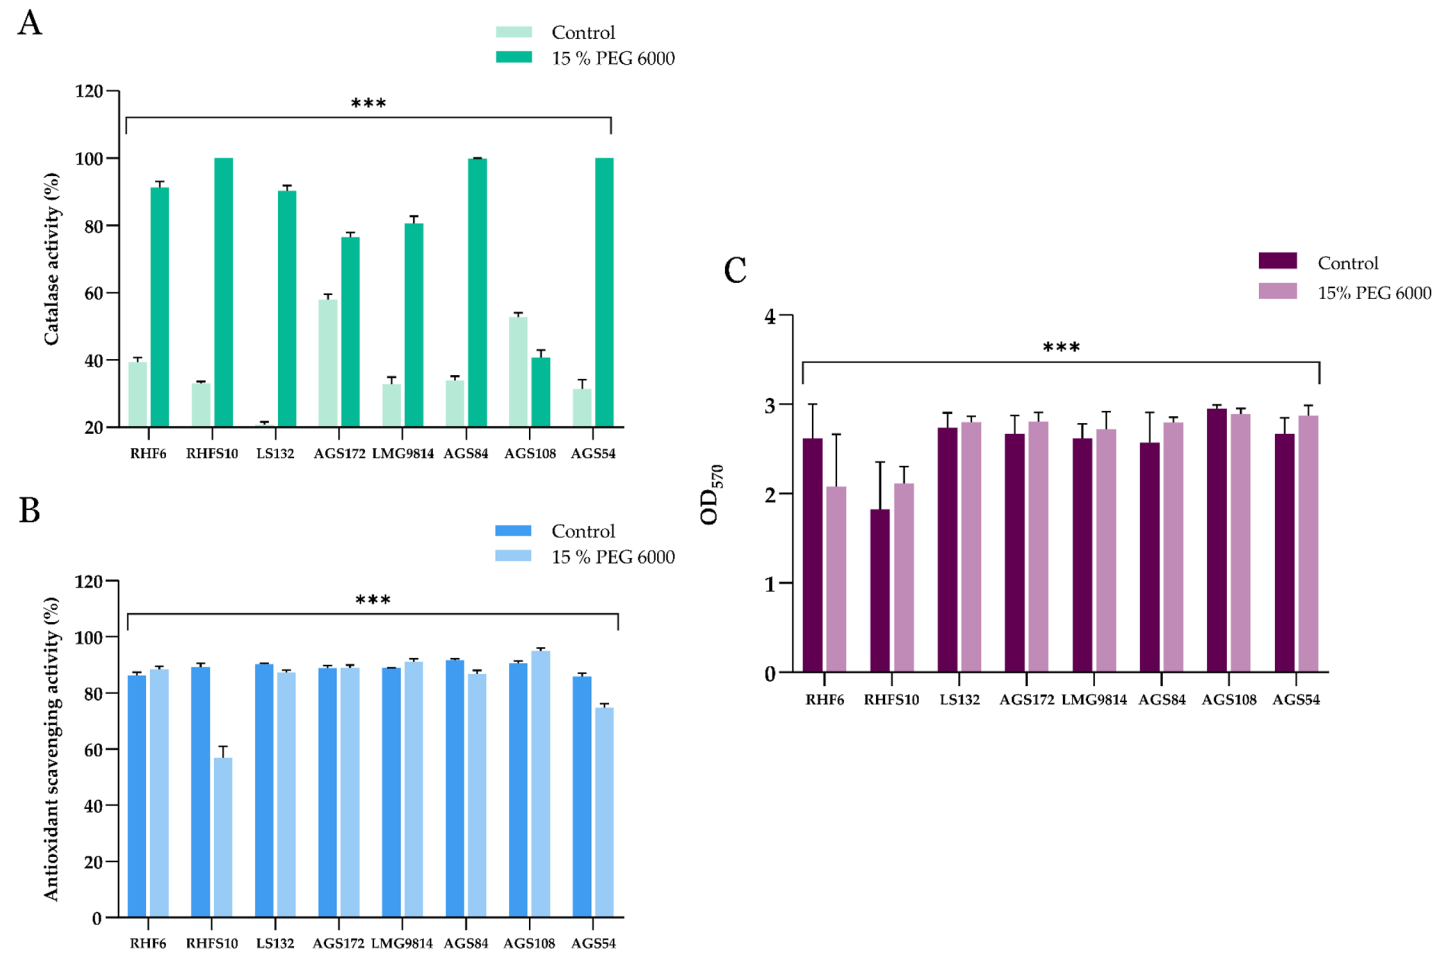

**Figure S1.** Bacterial antioxidant potential and biofilm production. Catalase activity (**a**), DPPH activity (**b**) and biofilm production shown as the absorbance of Crystal Violet registered at 570nm (**c**), assayed under either standard and drought stress (15% PEG 6000) conditions.

**Table S3.** *In vitro* bacterial compatibility.

| Strain  | RHF6 | RHFS10 | LS132 | AGS172 | LMG9814 | AGS84 | AGS108 | AGS54 |
|---------|------|--------|-------|--------|---------|-------|--------|-------|
| RHF6    |      |        |       |        |         |       |        |       |
| RHFS10  | +    |        |       |        |         |       |        |       |
| LS132   | -    | +      |       |        |         |       |        |       |
| AGS172  | +    | +      | +     |        |         |       |        |       |
| LMG9814 | +    | +      | +     | +      |         |       |        |       |
| AGS84   | +    | +      | nc    | -      | +       |       |        |       |
| AGS108  | +    | +      | +     | +      | +       | -     |        |       |
| AGS54   | -    | +      | +     | nc     | +       | +     | +      |       |

+: compatible; -: incompatible; nc: not clear



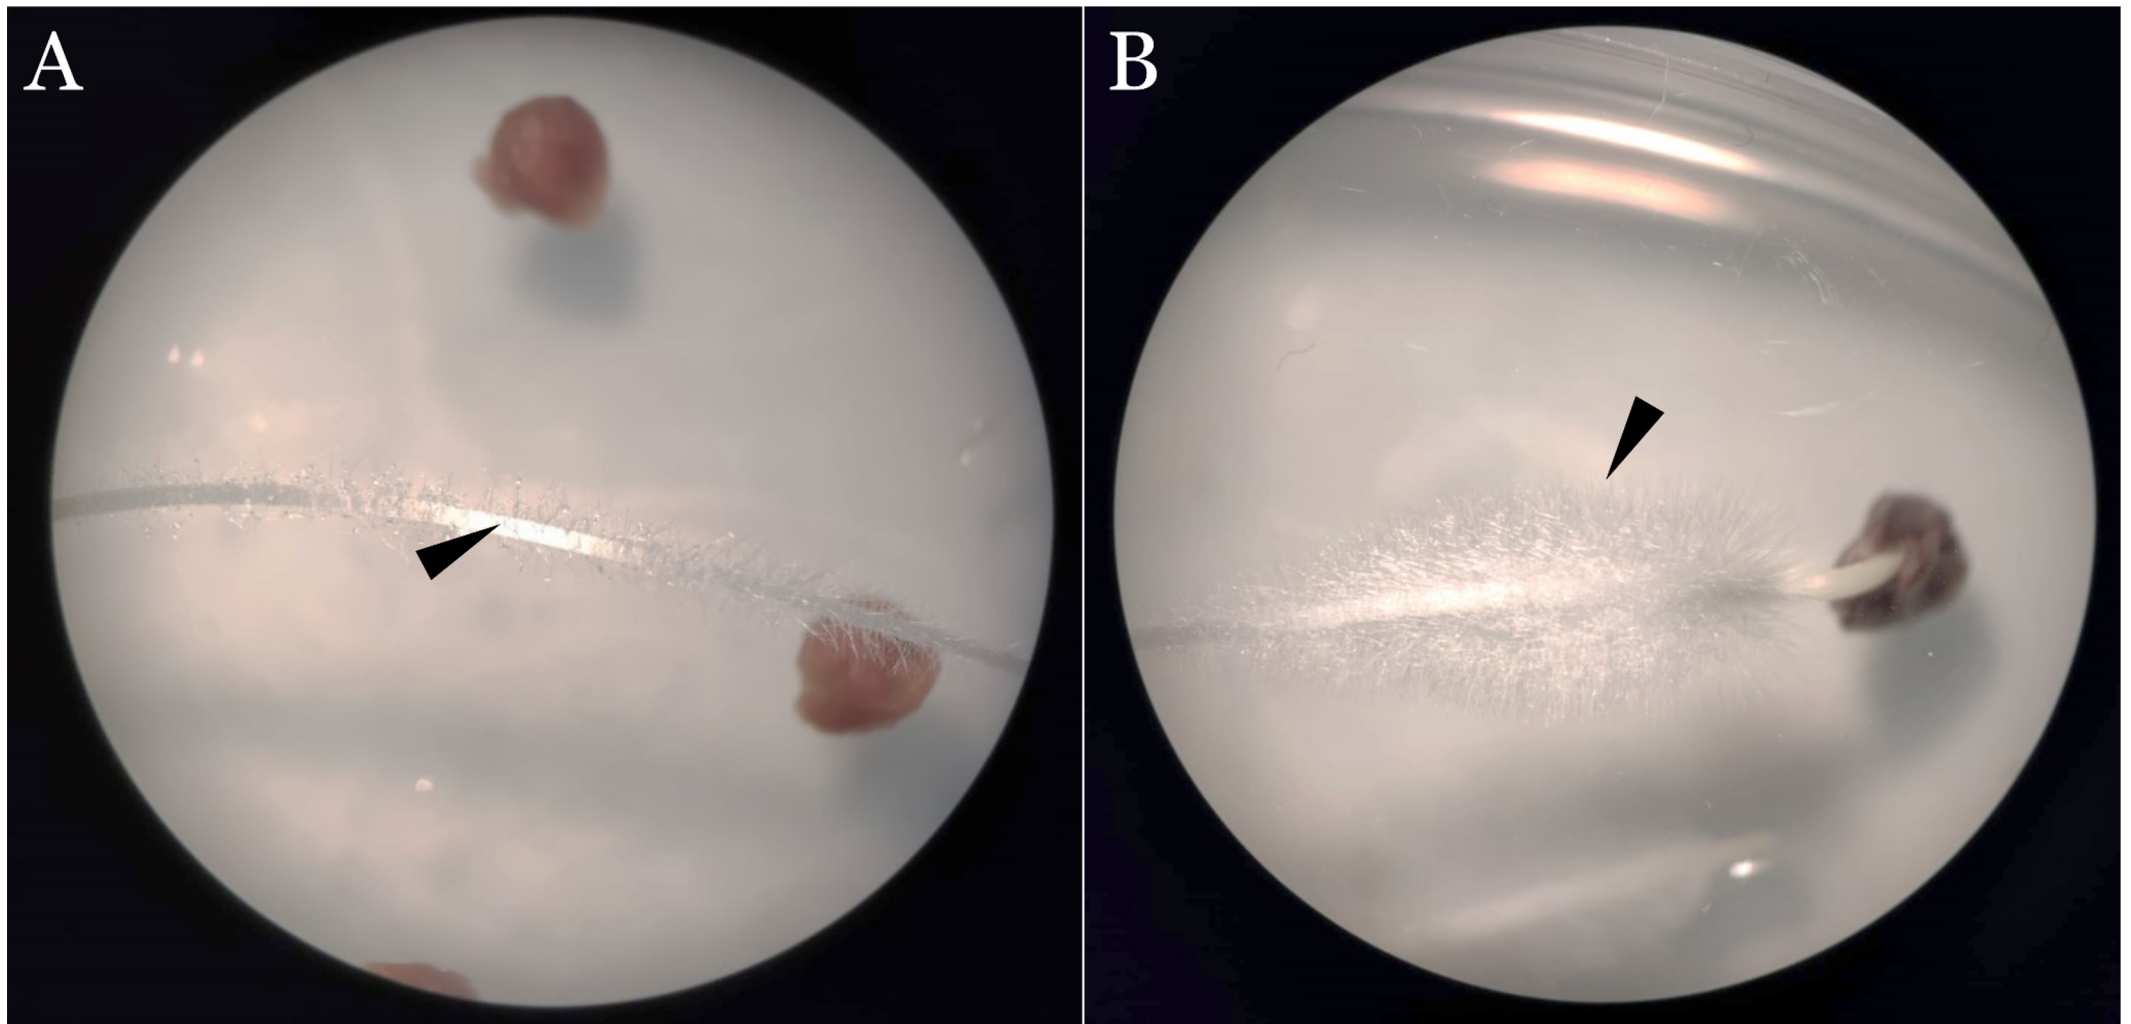

**Figure S2.** Representative pictures of lateral radicles of seedlings' roots, acquired by stereoscopic microscope (10X magnification) during the germination assay. (a) Seedlings treated with 1X PBS (control); (b) Seedlings treated with C2. Black arrows point at lateral radicles.

**Figure S3.** Comparison of the length of representative *S. oleracea* shoots treated with 1X PBS (C-) or the bacterial consortium (C2) after 27 days of growth under standard and drought conditions.

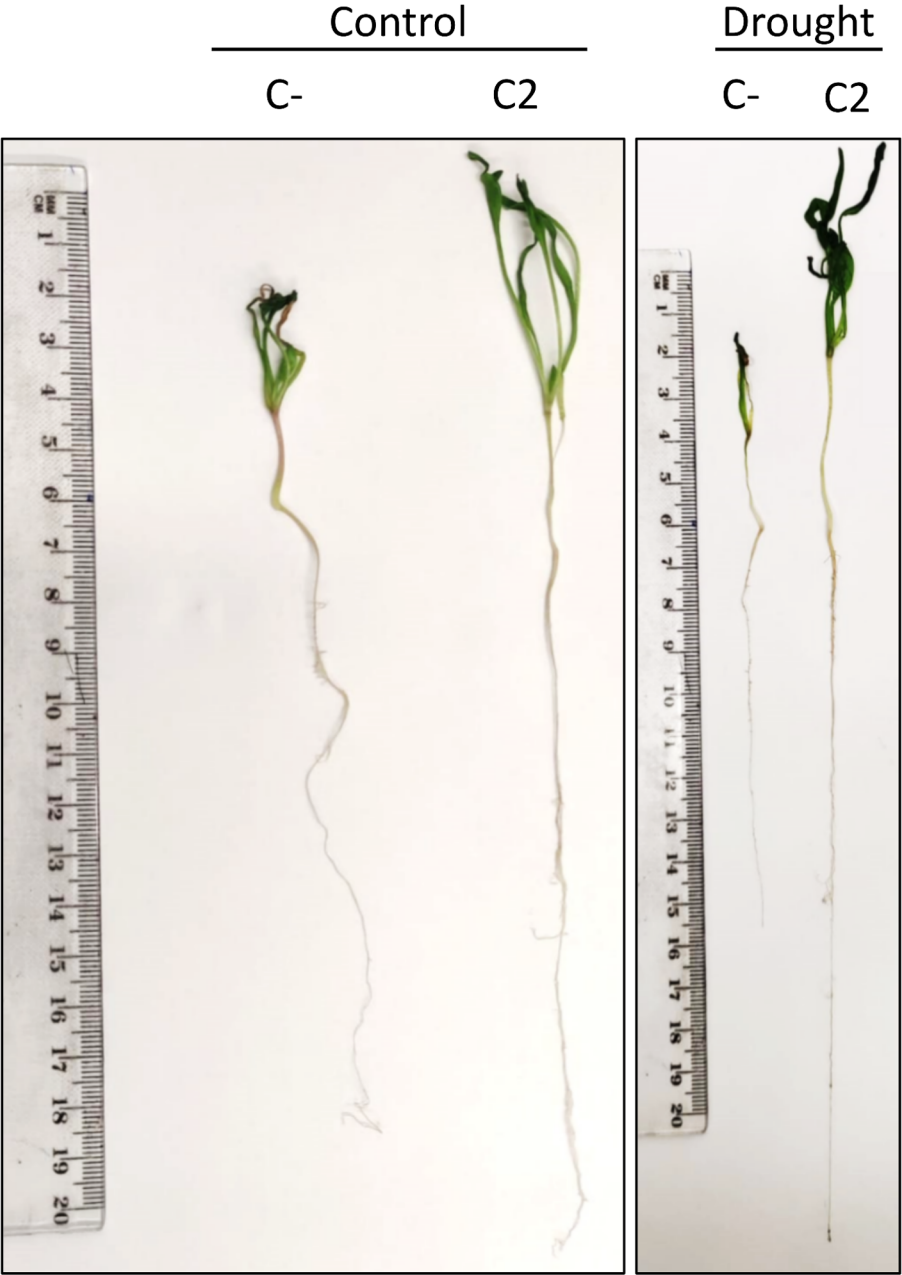

Supplement: s1 [file s1]
